# Supplementary material for: Isolation of infectious Lloviu virus from Schreiber’s bats in Hungary
Source: PubMed Central journal article supplement (PMC8971391; doi:10.1038/s41467-022-29298-1), 2022-03-31
Supplement: 41467_2022_29298_MOESM3_ESM.pdf [file 41467_2022_29298_MOESM3_ESM.pdf]

## Description of Additional Supplementary Files

File Name: Supplementary Data 1

Description: The dataset contains the processed samples and measurements that are involved in this study. There are four sheets (Live\_animals, Dead\_animals, Ectoparasites, Live animals + ectoparasites) with all available details (species, collection date, sex) about the collected specimens and the result of LLOV detection or serological status. Abbreviations: F – female, M – Male, neg – negative, POS – positive, NA - not applicable, NT – not tested

File Name: Supplementary Movie 1

Description: CytoSMART live cell imaging system video of the progress of cytopathic effect on SuBK12-08 cell line during LLOV infection.

File Name: Supplementary Movie 2

Description: CytoSMART live cell imaging system video of the progress of cytopathic effect on Vero E6 cell line during LLOV infection.
